# Supplementary material
Source: PubMed Central journal article supplement (PMC3421871)
Supplement: AAC.00124-12_zac999101218so1.pdf [file AAC.00124-12_zac999101218so1.pdf]

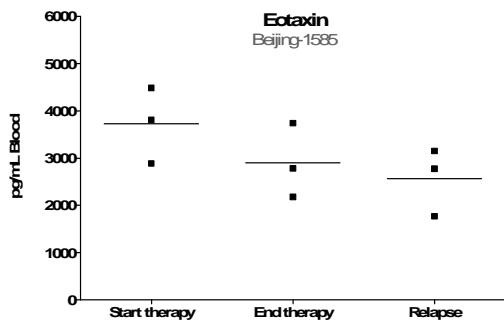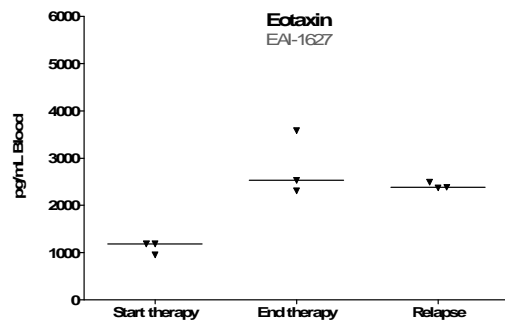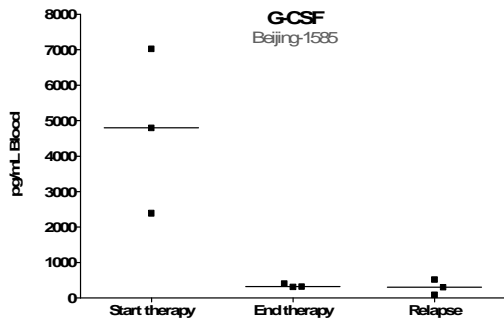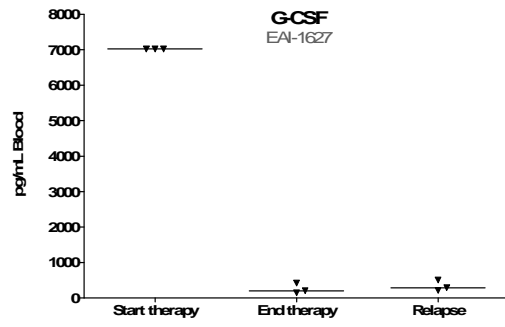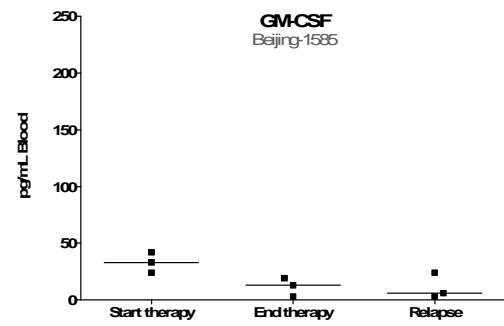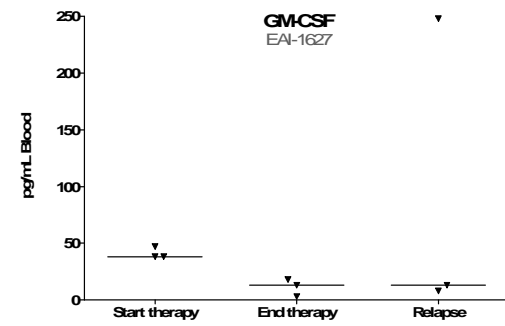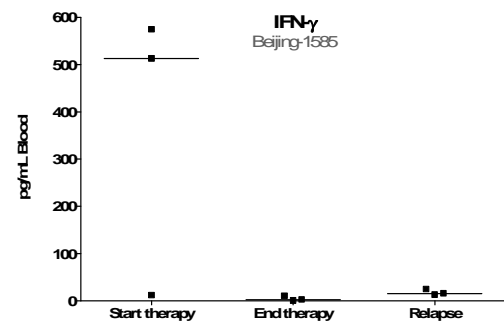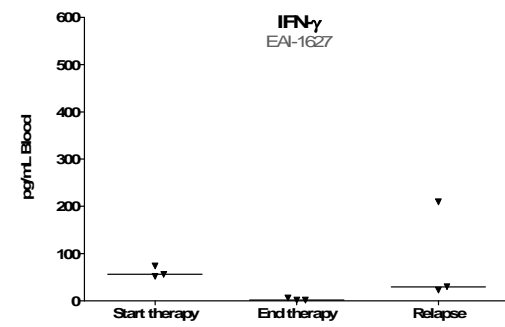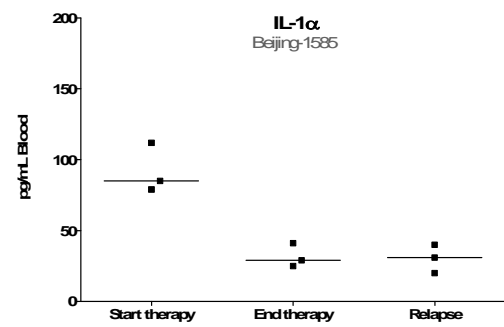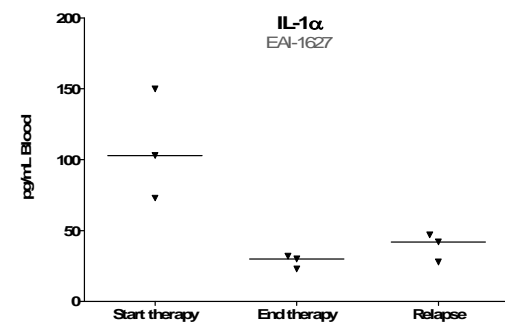

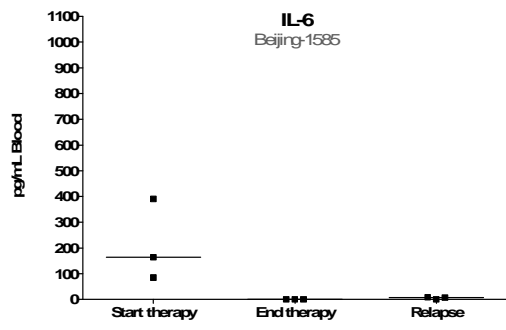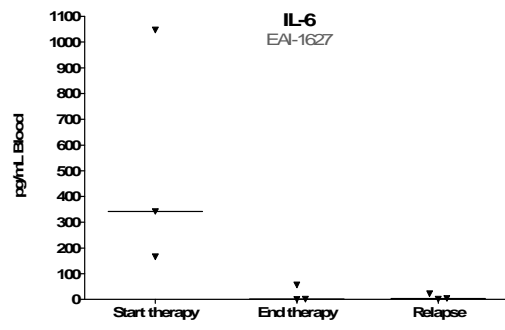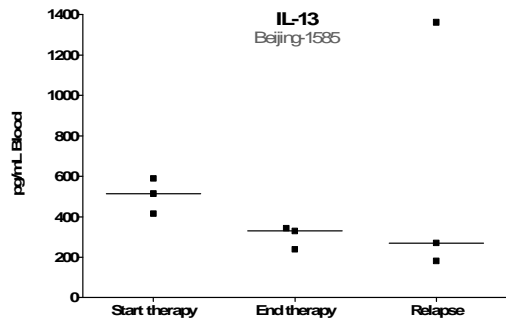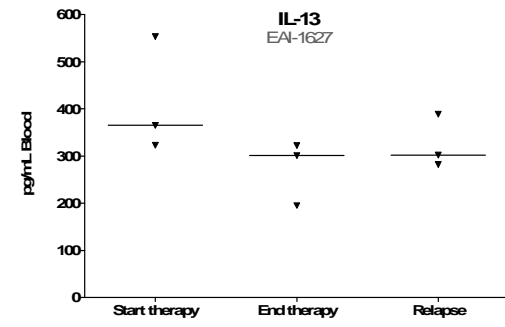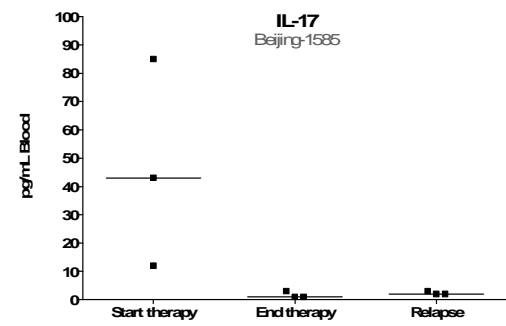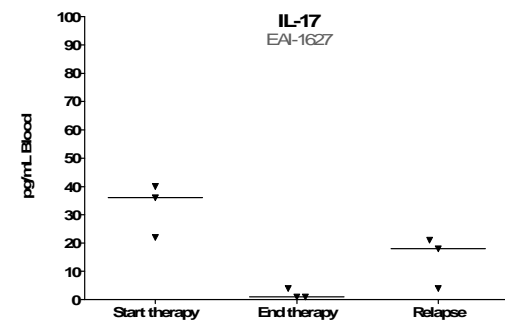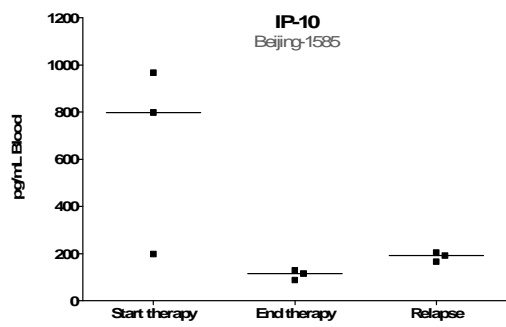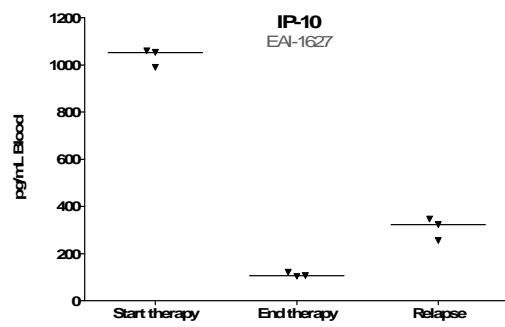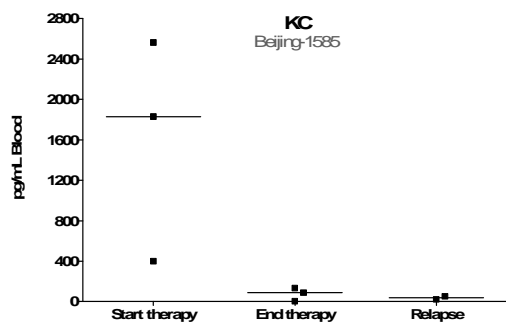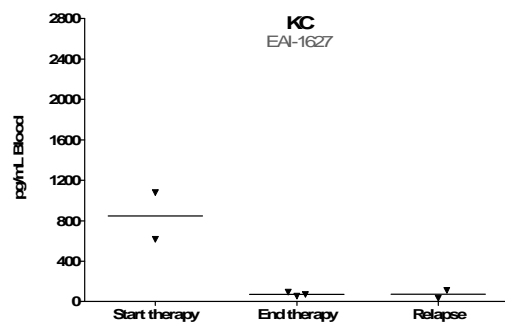

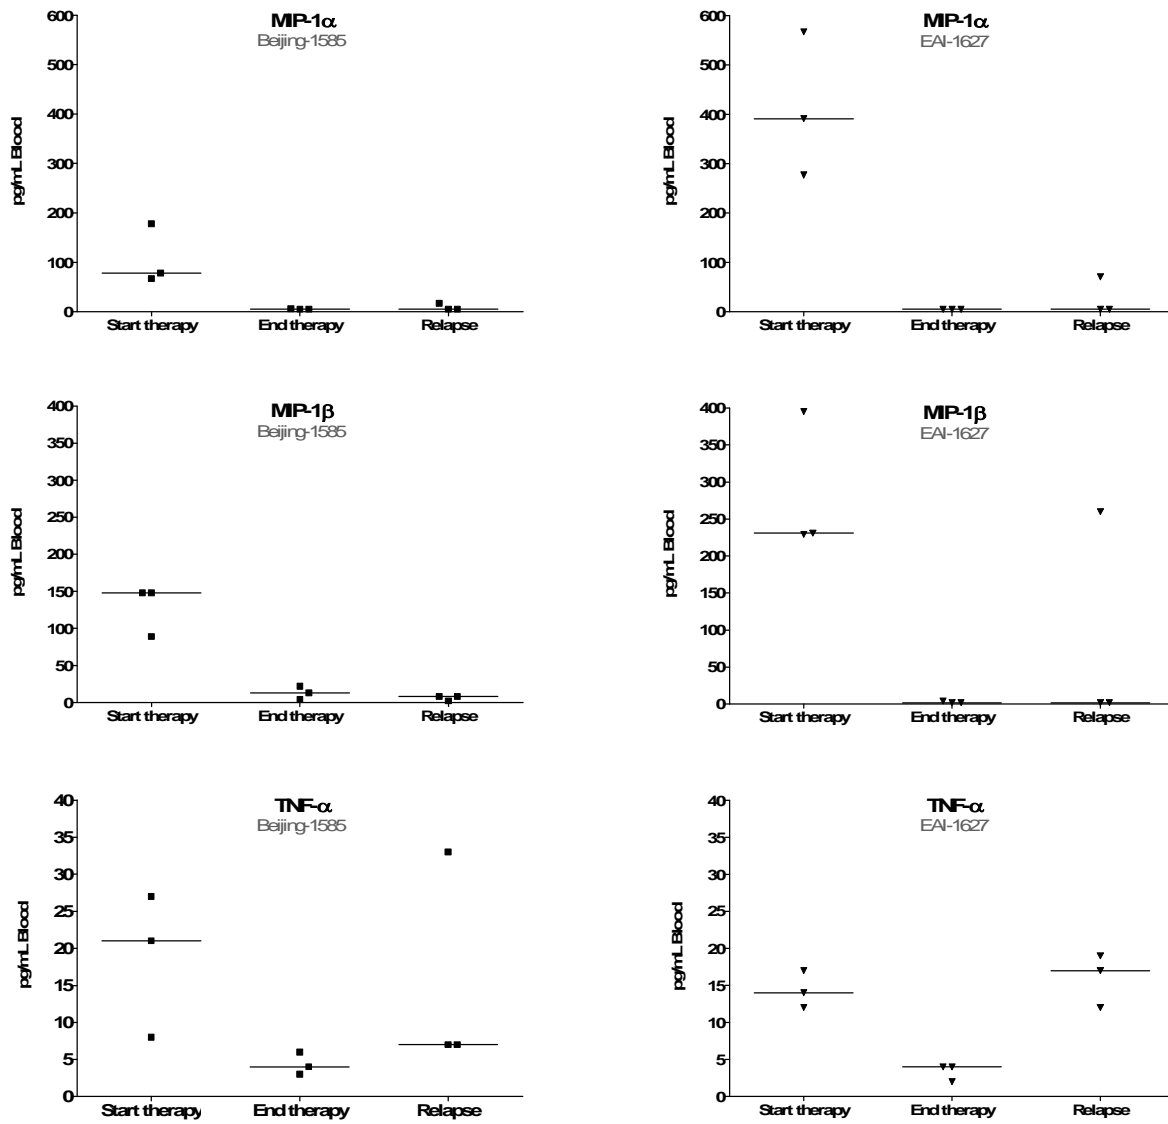

**Figure 1. Levels of indicated cytokines in plasma of Beijing-1585-infected mice (■) and EAI-1627-infected mice (▼).** Mice received non-compliance treatment (once per week for 13 weeks) at indicated time points. Quantification of cytokines (pg/mL) was performed using a bead-based flow cytometry technique. Results in median fluorescence intensity values were converted to pg/mL. Samples were tested in duplicate.
